# Supplementary material for: Global DNA Hypomethylation Prevents Consolidation of Differentiation Programs and Allows Reversion to the Embryonic Stem Cell State
Source: PubMed Central journal article supplement (PMC3531338; doi:10.1371/journal.pone.0052629), 2012-12-27
Supplement: pone.0052629.s012.pdf [file pone.0052629.s012.pdf]

**Table S1. TaqMan Assay ID numbers for qPCR**

| <b>Gene Name</b> | <b>Assay ID</b> |
|------------------|-----------------|
| Dnmt3a           | Mm00432884_m1   |
| Dnmt3b           | Mm01240113_m1   |
| Gapdh            | Mm99999915_g1   |
| Oct4             | Mm00658129_gH   |
| Nanog            | Mm01617761_g1   |
