# Supplementary material for: Global DNA Hypomethylation Prevents Consolidation of Differentiation Programs and Allows Reversion to the Embryonic Stem Cell State
Source: PubMed Central journal article supplement (PMC3531338; doi:10.1371/journal.pone.0052629), 2012-12-27
Supplement: pone.0052629.s013.pdf [file pone.0052629.s013.pdf]

**Table S2. Primer Sequences for qPCR**

| <b>Gene</b> | <b>Forward Primer (5'-3')</b> | <b>Reverse Primer (5'-3')</b>         |
|-------------|-------------------------------|---------------------------------------|
| Brachyury   | CTC CAA CCT ATG CGG ACA ATT C | ATG ACT CAC AGG CAG CAT GCT           |
| Eomes       | ACC GGC ACC AAA CTG AGA TGA   | GGG GTT GAG TCC GTT TAT GTT GAA       |
| fgf5        | GAT CTA CCC GGA TGG CAA AG    | TGC TGA AAA CTC CTC GTA TTC CT        |
| Gapdh       | CAT GGC CTT CCG TGT TCC TA    | CTT CAC CAC CTT CTT GAT GTC ATC       |
| Gata6       | CAA AAG CTT GCT CCG GTA ACA   | GGT CGC TTG TGT AGA AGG AGA AG        |
| Nestin      | ACT CTG CTG GAG GCT GAG AAC T | CAA GGA AAT GCA GCT TCA GCT T         |
| Sox1        | GCT TCG GAG GAC AAA AGA CAA   | AAG AGC TGG CGG GAA GTA AAC           |
| Tet1        | CCA GGA AGA GGC GAC TAC GTT   | TTA GTG TTG TGT GAA CCT GAT TTA TTG T |
