# Supplementary material for: Global DNA Hypomethylation Prevents Consolidation of Differentiation Programs and Allows Reversion to the Embryonic Stem Cell State
Source: PubMed Central journal article supplement (PMC3531338; doi:10.1371/journal.pone.0052629), 2012-12-27
Supplement: pone.0052629.s014.pdf [file pone.0052629.s014.pdf]

**Table S3. Primer Sequences for bisulfite Sequencing**

| <b>Gene</b>       | <b>Forward Primer (5'-3')</b>       | <b>Reverse Primer (5'-3')</b>      |
|-------------------|-------------------------------------|------------------------------------|
| Brachyury (PCR 1) | GGT GGG AGT TAG TGG TAG TTT AT      | CAA AAC CCT AAC TCC TAA AAC CA     |
| Brachyury (PCR 2) | TTT AAA GTT GTT ATA TTT GGG GAG GT  | = Reverse from PCR1                |
| Fgf5 (PCR1)       | TAG GGT GGT TTT TTA GTG GAG AAA T   | ATT ATC AAA AAC CAC CCA ATC ACC    |
| Fgf5 (PCR2)       | ATG GTA GGG GTT AGT AAT TTG GAA     | = Reverse from PCR1                |
| Nestin (PCR1)     | GGA AGA ATT TTT TTA GAT GTG GGA G   | CAA CCT AAA TAC TCA ACC ACC C      |
| Nestin (PCR2)     | GAG GAG TAG AAT TAG TTG TTT AGT     | = Reverse from PCR1                |
| Sox1 (PCR1)       | GTT AGT TTA GGT TGG GTT TTA TGA AAT | AAT CCC TAT CTC AAA ACC TAC TAC    |
| Sox1 (PCR2)       | = Forward from PCR1                 | CCT AAA CCT ATC AAT ATA AAC CCT AT |
| Tet1 (PCR1)       | TTT TTA GGA TGT TAT TTG GAT GAT T   | CAC AAC CTT TAC TAA ACCC TAT ACC   |
| Tet1 (PCR2)       | = Forward from PCR1                 | TAT CTC CCC AAT ACA AAC CTC        |
