# Supplementary material for: Global DNA Hypomethylation Prevents Consolidation of Differentiation Programs and Allows Reversion to the Embryonic Stem Cell State
Source: PubMed Central journal article supplement (PMC3531338; doi:10.1371/journal.pone.0052629), 2012-12-27
Supplement: pone.0052629.s015.pdf [file pone.0052629.s015.pdf]

**Table S4. Primer Sequences for Pyrosequencing**

| <b>Gene</b>  | <b>Forward Primer (5'-3')</b>          | <b>Reverse Primer (5'-3')</b>           |
|--------------|----------------------------------------|-----------------------------------------|
| Oct4 (PCR 1) | ATG GGT TGA AAT ATT GGG TTT ATT TA     | ACC CTC TAA CCT TAA CCT CTA AC          |
| Oct4 (PCR 2) | GTA AGA ATT GAG GAG TGG TTT TAG        | = Reverse from PCR1 with 5'biotinylated |
| Nanog (PCR1) | TAG TTT GGG TTA TTT TAT AGT TTT TTT TG | CCA AAA AAA CCC ACA CTC ATA TC          |
| Nanog (PCR2) | AAT GTT TAT GGT GGA TTT TGT AGG T      | = Reverse from PCR1 with 5'biotinylated |
